# Supplementary material
Source: publisher site journal article supplement (https://www.spandidos-publications.com/7218/downloadSupplementary)
Supplement: Supplementary file 1 [file downloadSupplementary]

Table SI. Primer sequences.

| Primer name                       | Sequence, 5'-3'                                        |
|-----------------------------------|--------------------------------------------------------|
| <i>GAPDH</i> (NCBI gene ID: 2597) | F: GTCTCCTCTGACTTCAACAGCG<br>R: ACCACCCTGTTGCTGTAGCCAA |
| <i>ESR1</i> (NCBI gene ID: 2099)  | F: GGAAGTATGGCTATGGAATCTG<br>R: TGGCTGGACACATATAGTCGTT |
| <i>ABCB1</i> (NCBI gene ID: 5243) | F: TTGCTGCTTACATTCAGGTTTCA<br>R: AGCCTATCTCCTGTCGCATTA |

*ABCB1*, ATP binding cassette subfamily B member 1; *ESR1*, estrogen receptor 1; NCBI, National Center for Biotechnology Information.
